# Supplementary material for: Gastrointestinal Stromal Tumours (GIST) in Young Adult (18–40 Years) Patients: A Report from the Dutch GIST Registry
Source: PubMed Central journal article supplement (PMC7140070; doi:10.3390/cancers12030730), 2020-03-20
Supplement: cancers-12-00730-s001.pdf [file cancers-12-00730-s001.pdf]

**Table S1.** Adolescents and young adults (AYA) age-related GIST data in existing literature.

|                       | <b>Paediatric Patients</b>                                                                                 | <b>AYA Patients</b>                                                   | <b>Adult Patients</b> |                    |
|-----------------------|------------------------------------------------------------------------------------------------------------|-----------------------------------------------------------------------|-----------------------|--------------------|
| Age range             | ≤18                                                                                                        | 18–29                                                                 | 13–39                 | ≥40                |
| Studies               | Prakash et al. (2005) <i>n</i> = 5<br>Benesch et al. (2011) <i>n</i> =16<br>Kang et al. (2013) <i>n</i> =2 | Prakash et al. (2005) <i>n</i> =10<br>Kang et al. (2013) <i>n</i> =20 | Fero et al. (2017)    | Fero et al. (2017) |
| Total no. of patients | 23 (100)                                                                                                   | 30 (100)                                                              | 392 (100)             | 5373 (100)         |
| Gender                |                                                                                                            |                                                                       |                       |                    |
| Male                  | 5 (21.7)                                                                                                   | 9 (30.0)                                                              | 207 (52.8)            | 2767 (51.5)        |
| Female                | 18 (78.3)                                                                                                  | 21 (70.0)                                                             | 185 (47.2)            | 2606 (48.5)        |
| Localization          |                                                                                                            |                                                                       |                       |                    |
| Stomach               | 18 (78.3)                                                                                                  | 12 (40.0)                                                             | 210 (53.6)            | 3048 (56.7)        |
| Small intestine       | 3 (13.0)                                                                                                   | 16 (53.3)                                                             | 139 (35.5)            | 1465 (27.3)        |
| Other                 | 2 (8.7)                                                                                                    | 2 (6.7)                                                               | 43 (10.9)             | 860 (16)           |
| Presentation          |                                                                                                            |                                                                       |                       |                    |
| Local disease         | 13 (56.5)                                                                                                  | Not reported                                                          | 212 (54.1)            | 2937 (54.7)        |
| Metastasized          | 3 (13.0)                                                                                                   |                                                                       | 148 (37.7)            | 1992 (37.1)        |
| Unknown               | 7 (30.4)                                                                                                   |                                                                       | 32 (8.2)              | 444 (8.3)          |
| KIT mutation          |                                                                                                            |                                                                       |                       |                    |
| Present               | 1 (4.3)                                                                                                    | 19 (63.3)                                                             | Not reported          | Not reported       |
| Not present           | 12 (52.2)                                                                                                  | 10 (33.3)                                                             |                       |                    |
| Unknown               | 10 (43.5)                                                                                                  | 1 (3.3)                                                               |                       |                    |
| PDGFRA mutation       |                                                                                                            |                                                                       |                       |                    |
| Present               | 1 (4.3)                                                                                                    | 2 (6.7)                                                               | Not reported          | Not reported       |
| Not present           | 5 (21.7)                                                                                                   | 18 (60.0)                                                             |                       |                    |
| Unknown               | 17 (73.9)                                                                                                  | 10 (33.3)                                                             |                       |                    |
| Survival              | Incomplete data                                                                                            | 20 ANED<br>7 AWD<br>3 DOD                                             | 5-year OS<br>82.4%    | 5-year OS<br>67.1% |

ANED = Alive with no evidence of disease; AWD = Alive with disease; DOD = Died of disease.
